# Supplementary material
Source: PubMed Central journal article supplement (PMC4224043)
Supplement: Supp_Table1.pdf [file Supp_Table1.pdf]

SUPPLEMENTARY TABLE S1. PRIMERS USED FOR QUANTITATIVE POLYMERASE CHAIN REACTION

| <i>Gene</i>    | <i>Forward primer (5'-3')</i> | <i>Reverse primer (5'-3')</i> |
|----------------|-------------------------------|-------------------------------|
| HO-1           | CGCCTTCCTGCTCAACATT           | TGTGTTCTCTGTCAGCATCAC         |
| NQO1           | GCAGTGCTTTCCATCACCAC          | TGGAGTGTGCCCAATGCTAT          |
| GCL-C          | ATGTGGACACCCGATGCAGTATT       | TGTCTTGCTTGTAGTCAGGATGGTTT    |
| GCL-M          | GCCACCAGATTTGACTGCCTTT        | CAGGGATGCTTTCTTGAAGAGCTT      |
| HIF1 $\alpha$  | TTCAGGAAAACGTAAACACTCC        | GGGATATAGGGAGCCAGCAT          |
| $\beta$ -actin | GTATGACTCCACTCACGGCAAA        | GGTCTCGCTCCTGGAAGATG          |

GCL-C, catalytic subunits of glutamyl cysteine ligase; GCL-M, modulatory subunits of glutamyl cysteine ligase; HIF1 $\alpha$ , hypoxia induced factor 1 alpha; HO-1, heme oxygenase-1; NQO1, nicotinamide adenine dinucleotide phosphate quinone oxidoreductase-1.
